# Supplementary material for: Spatial transcriptomics reveals segregation of tumor cell states in glioblastoma and marked immunosuppression within the perinecrotic niche
Source: PubMed Central journal article supplement (PMC11036705; doi:10.1186/s40478-024-01769-0), 2024-04-22

18-0282:

**cor=-0.256**  
**padj=7.6465e-18**

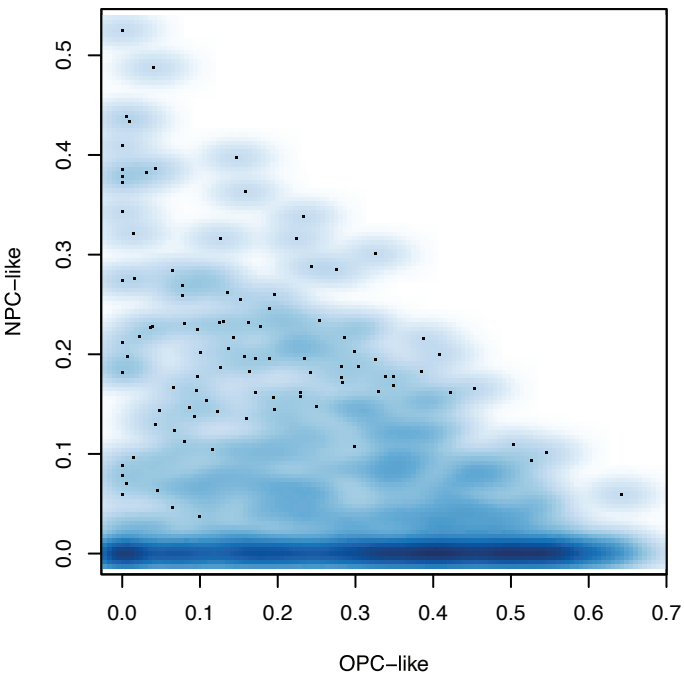

**cor=-0.858**  
**padj<2.2e-16**

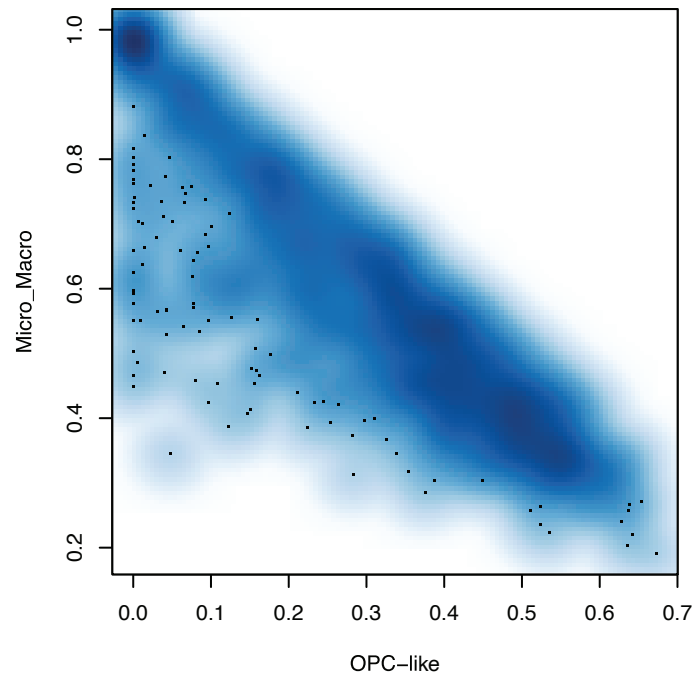

**cor=0.310**  
**padj=8.0042e-26**

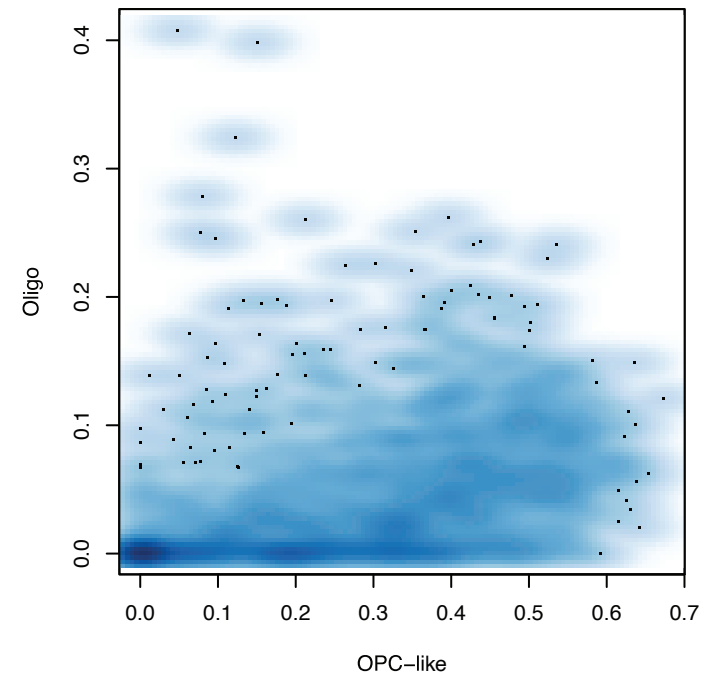

**cor=-0.240**  
**padj=6.8915e-16**

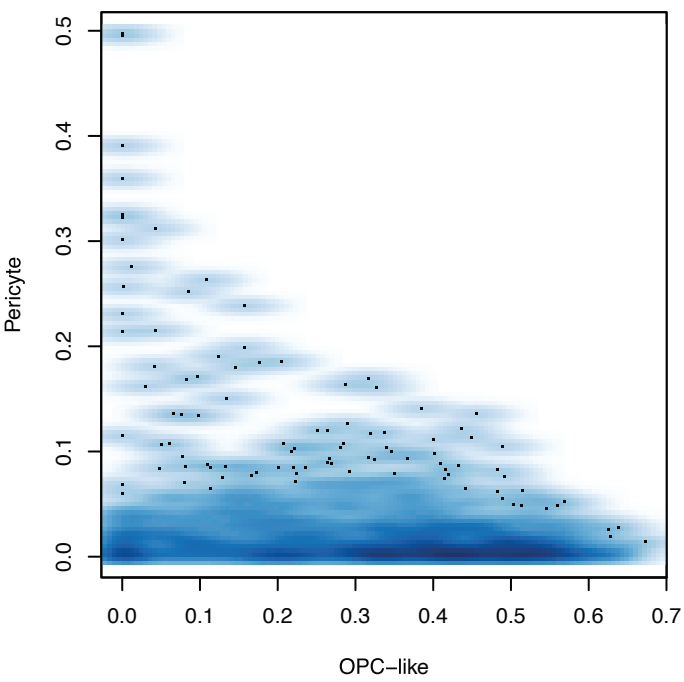

**cor=-0.093**  
**padj=2.0563e-03**

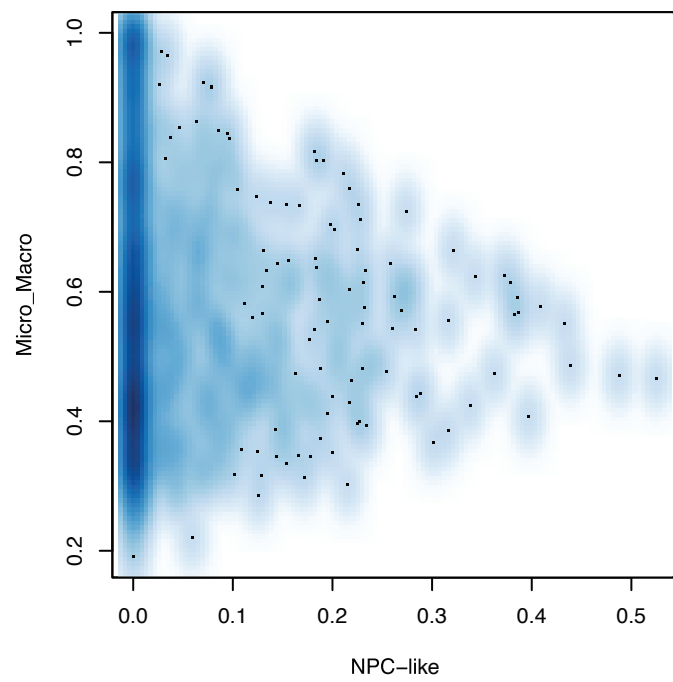

**cor=-0.116**  
**padj=1.4089e-04**

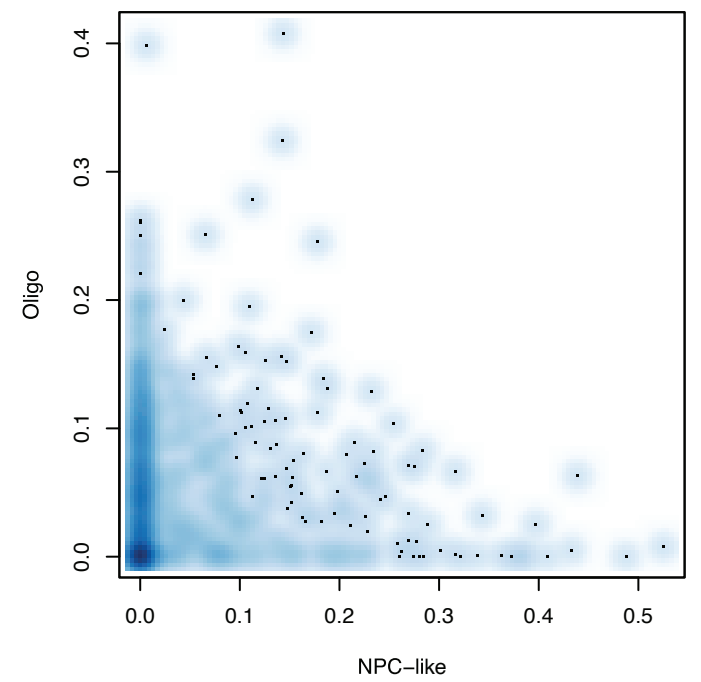

**cor=-0.148**  
**padj=1.1512e-06**

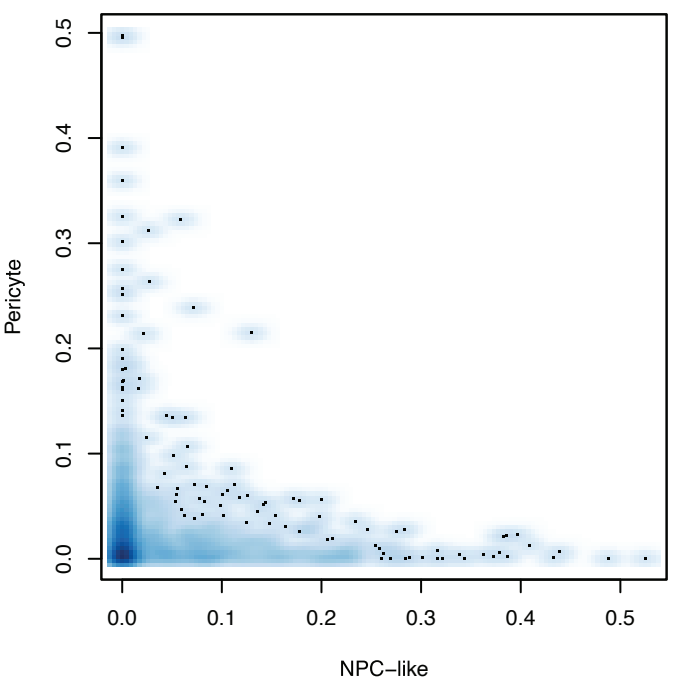

**cor=-0.566**  
**padj=3.2961e-95**

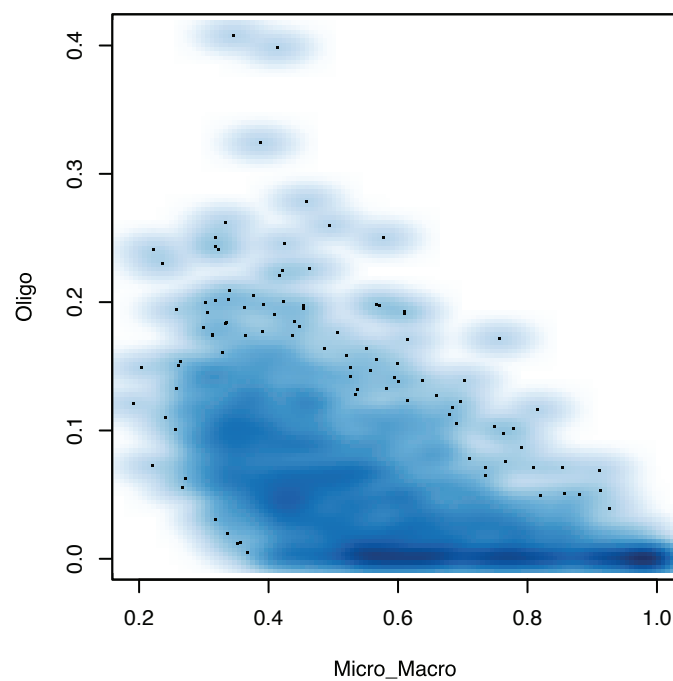

**cor=0.004**  
**padj=9.0565e-01**

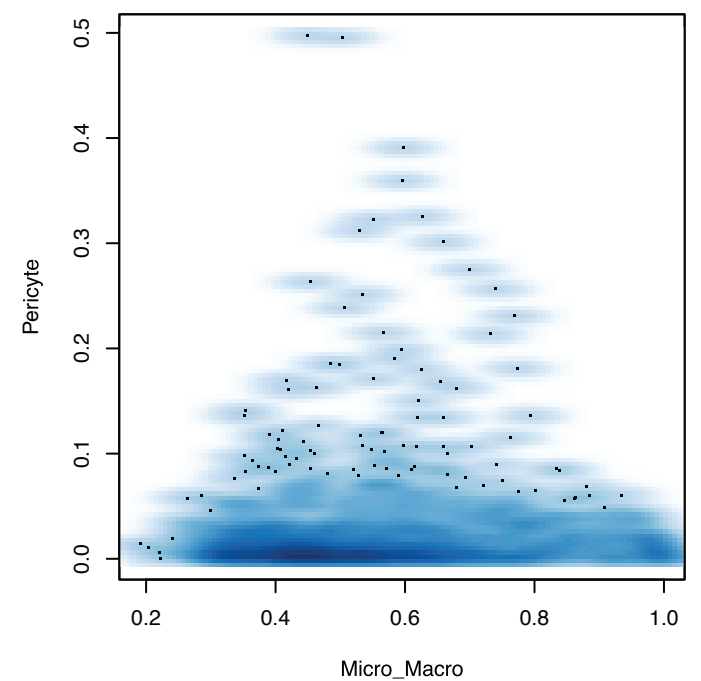

**cor=0.112**  
**padj=2.0602e-04**

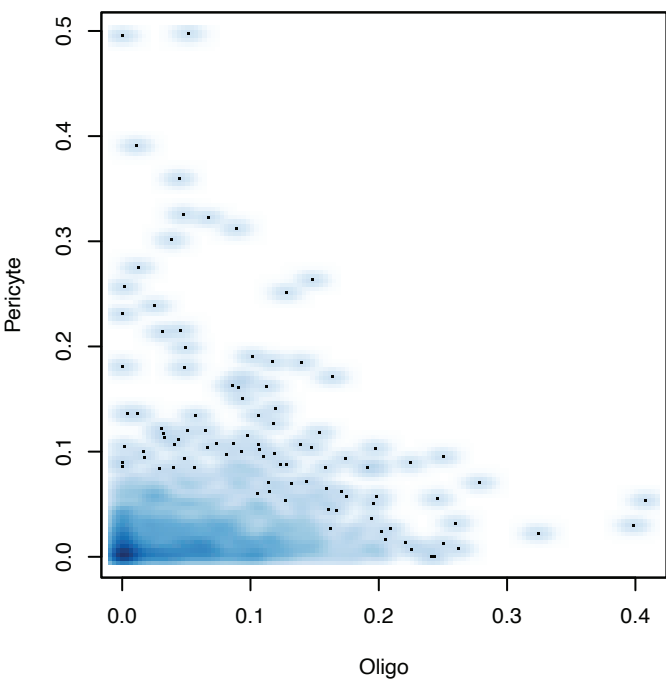

19-0142:

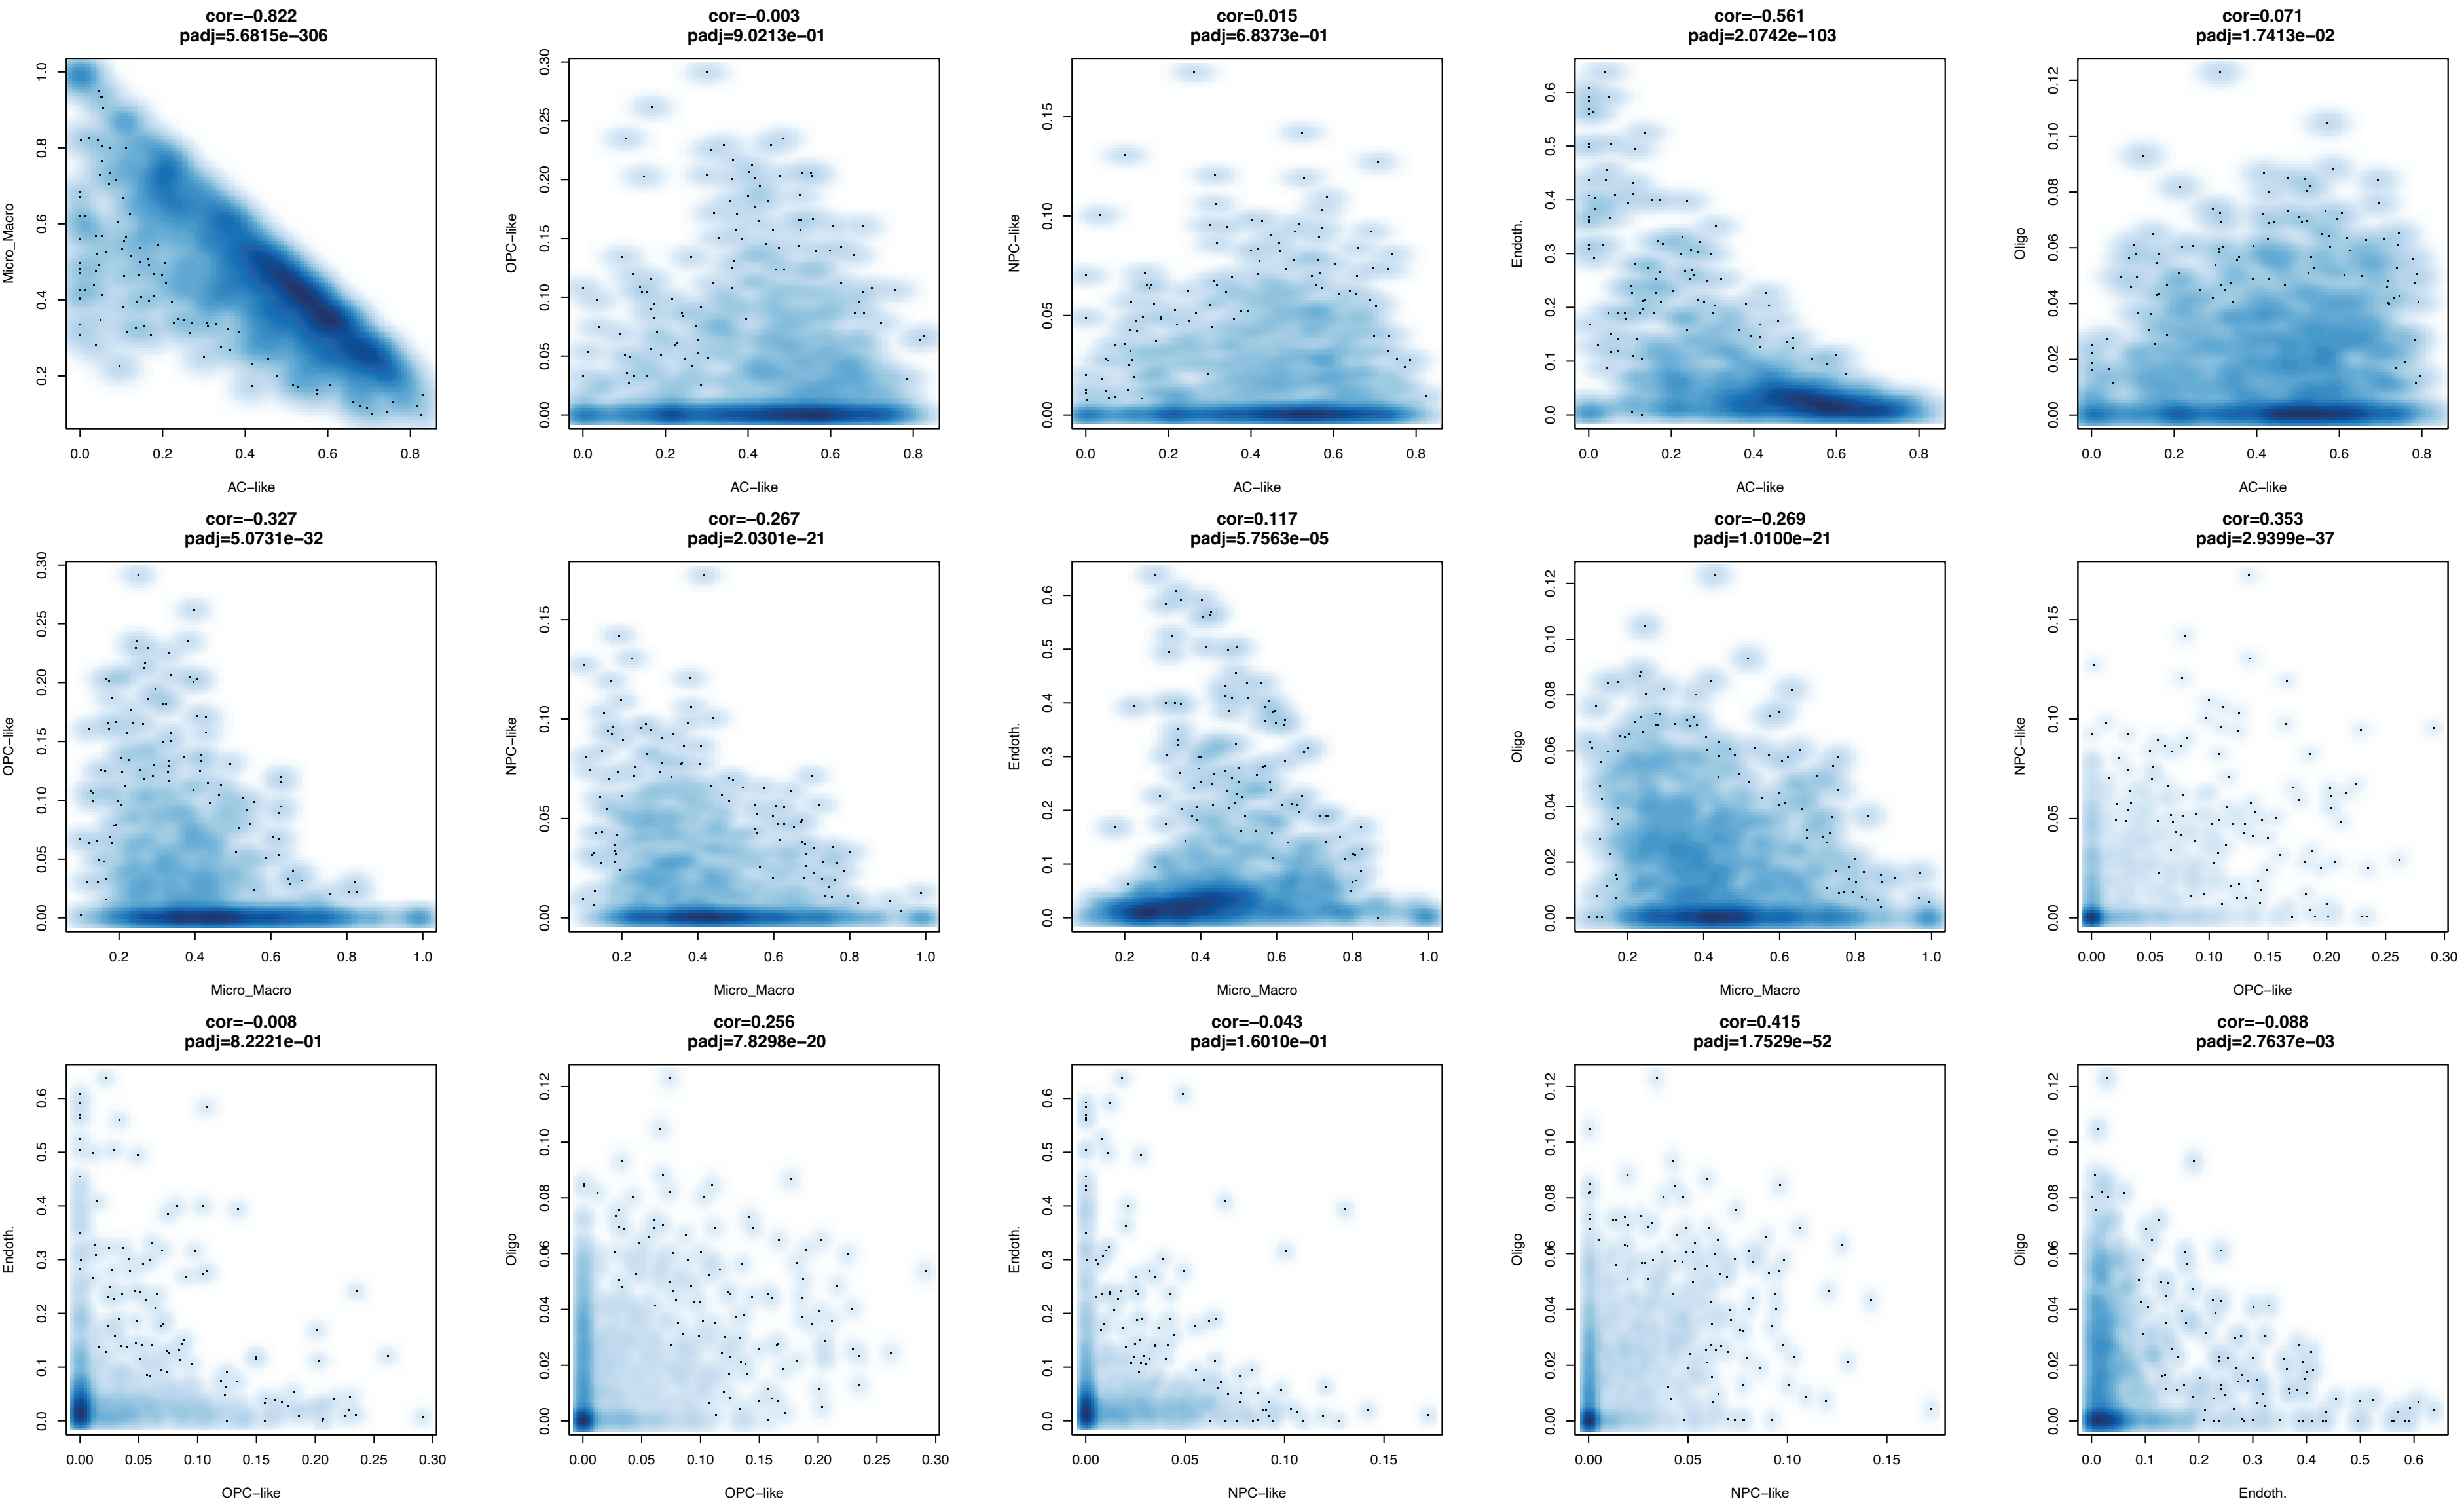

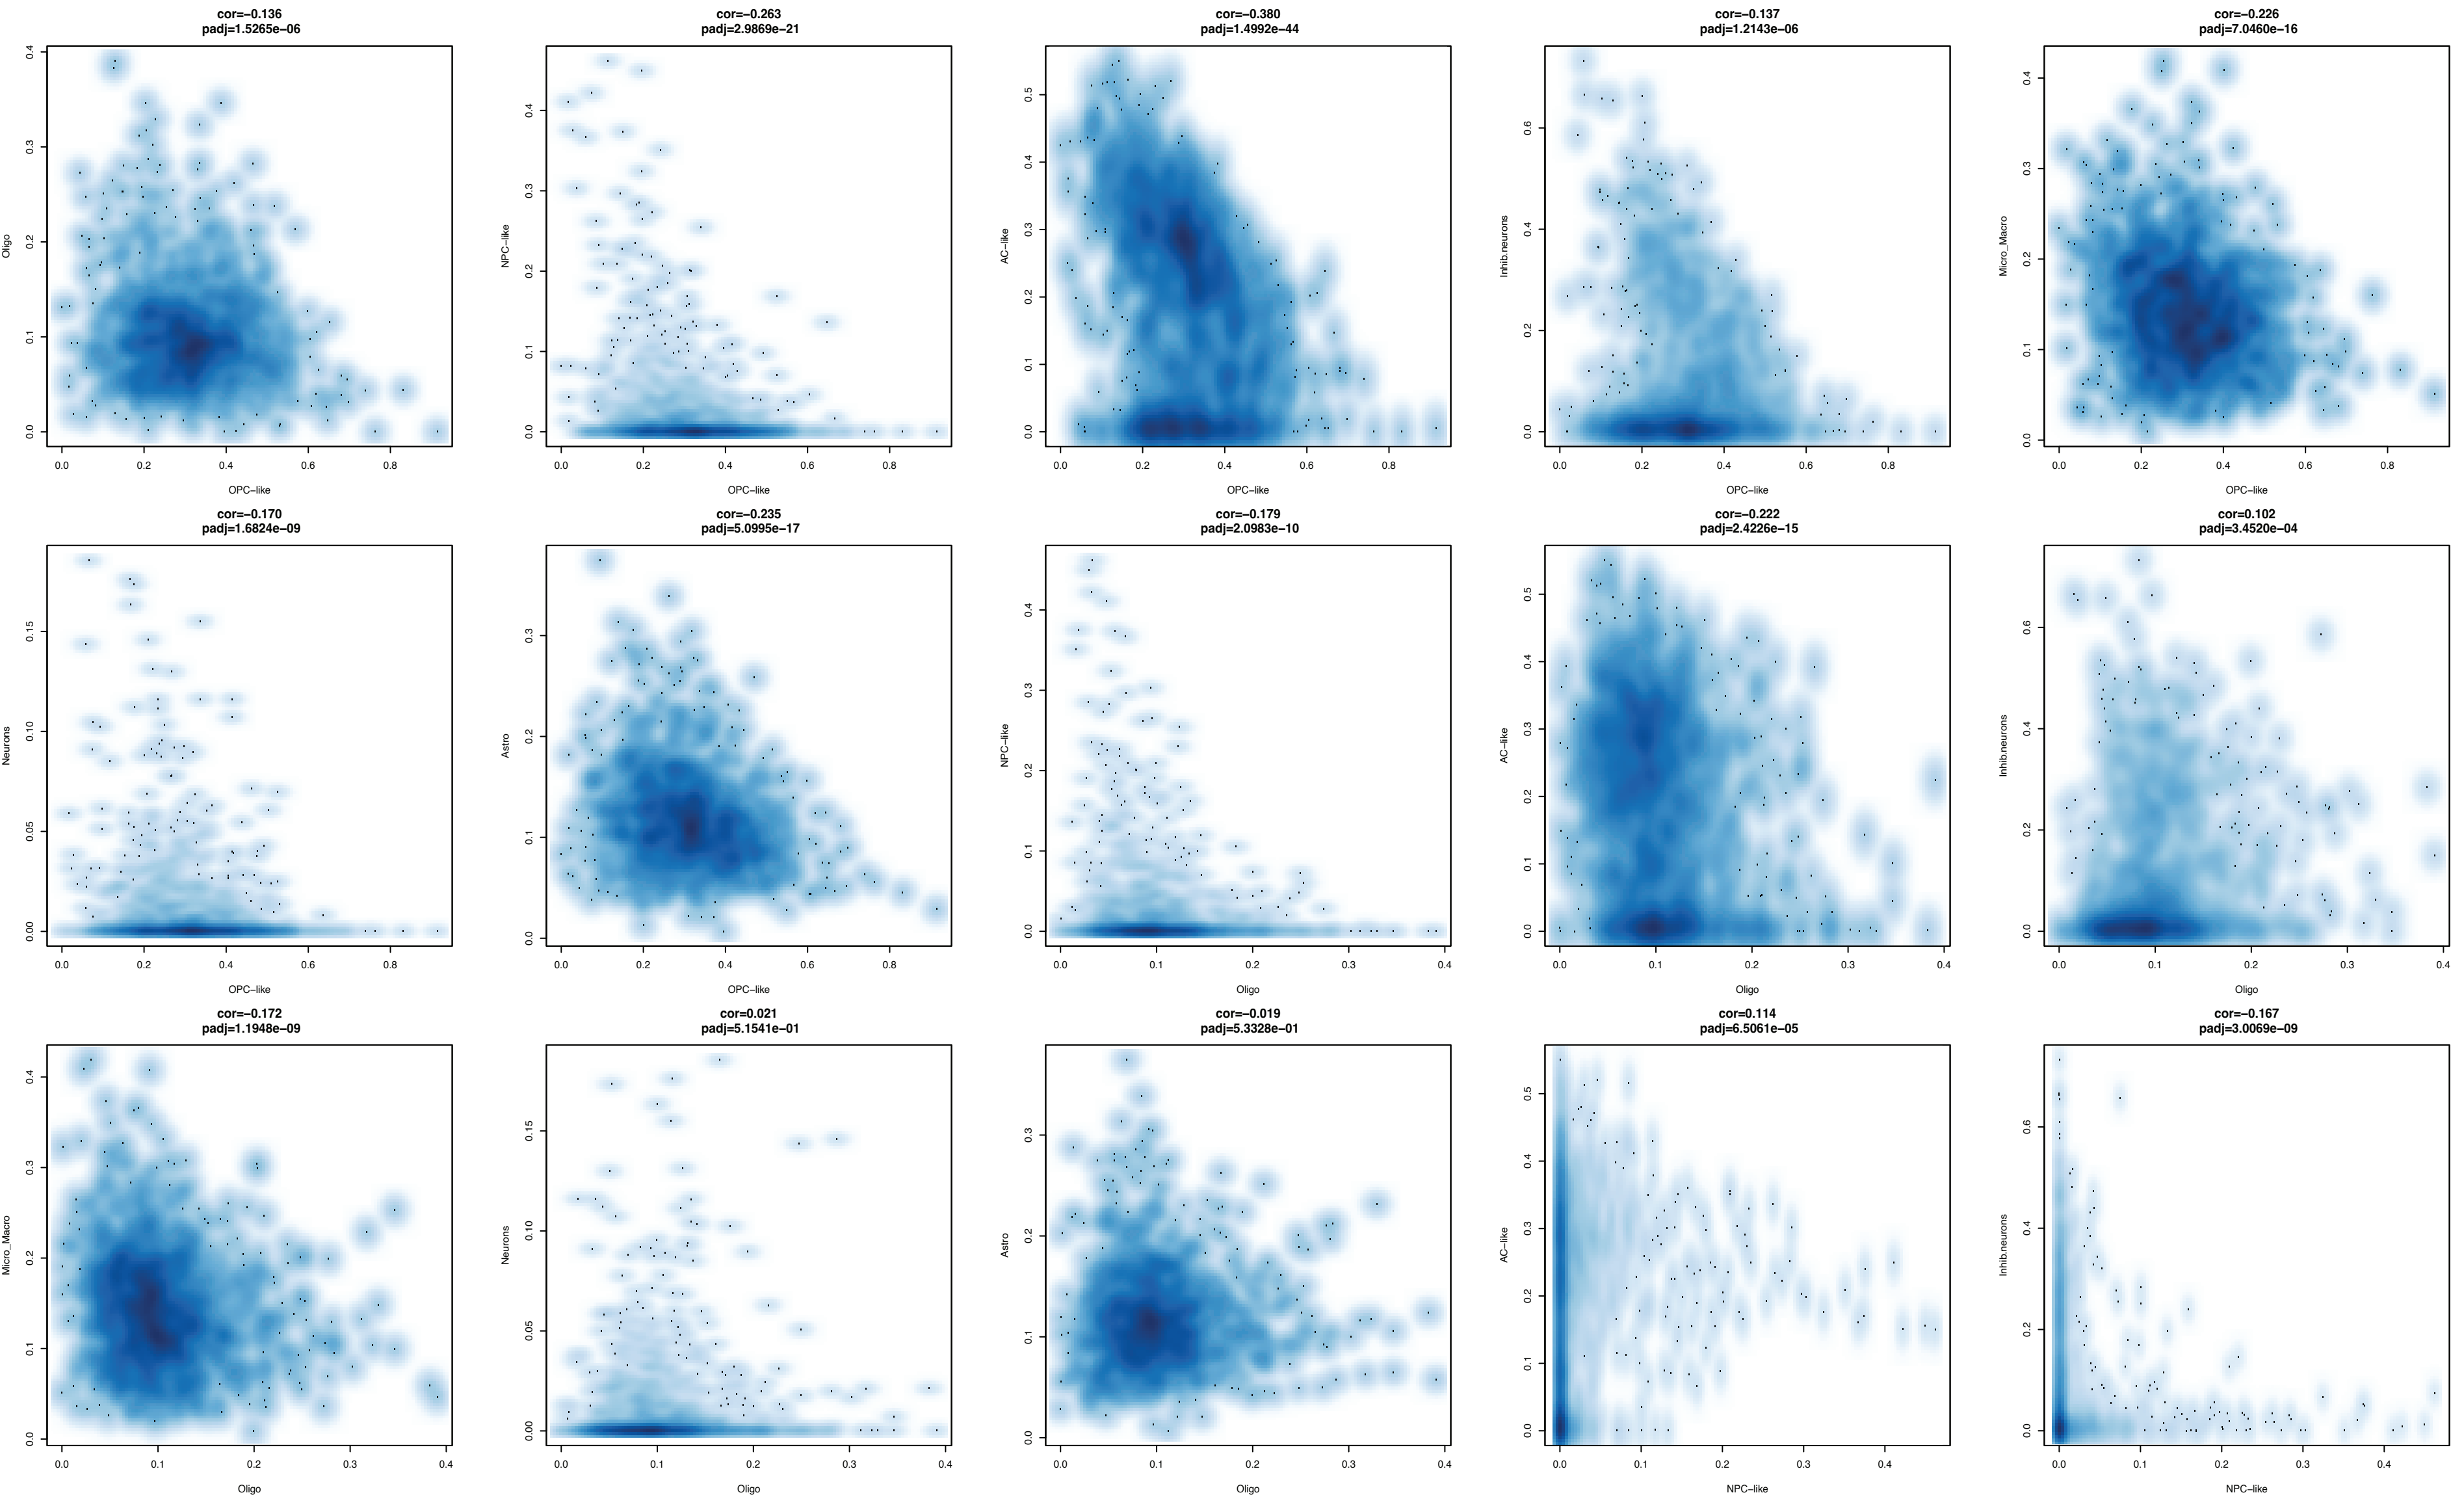

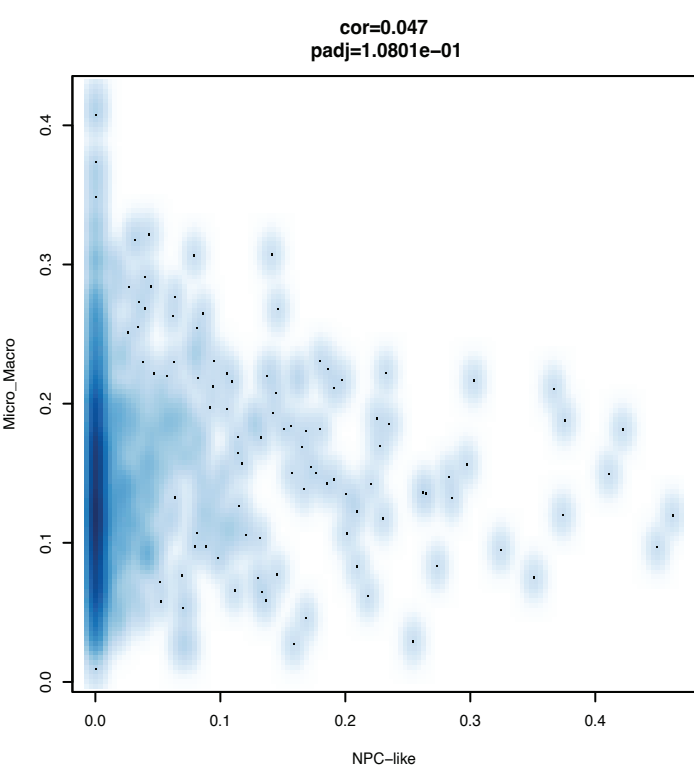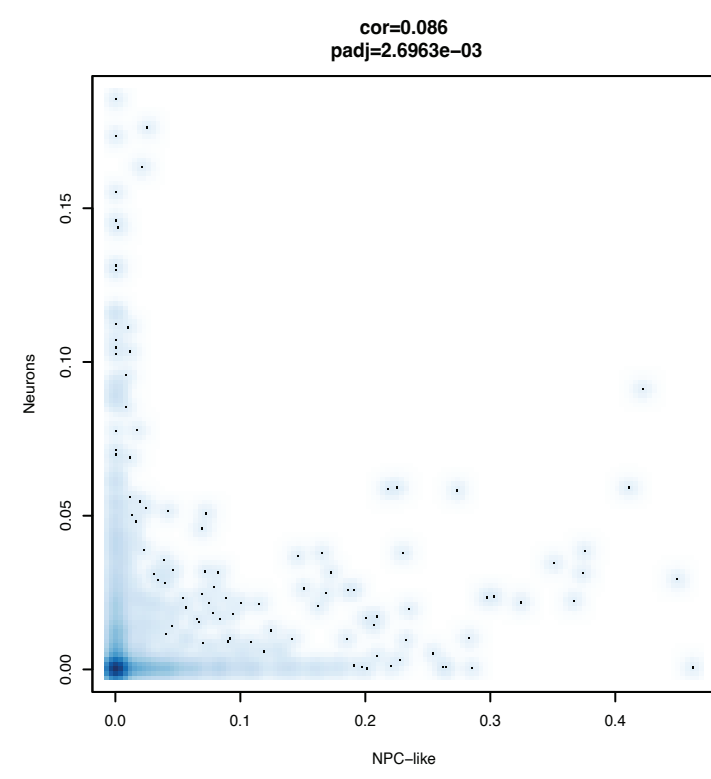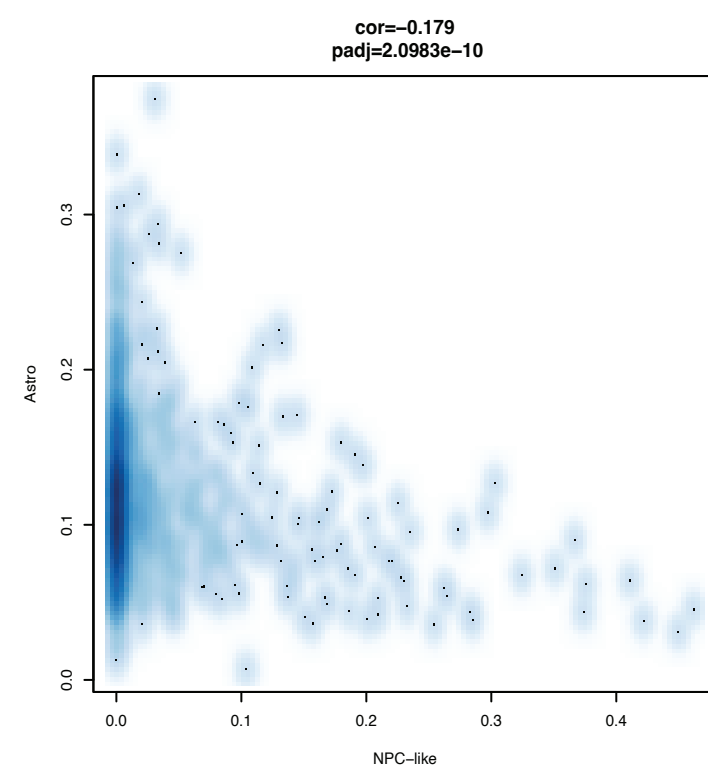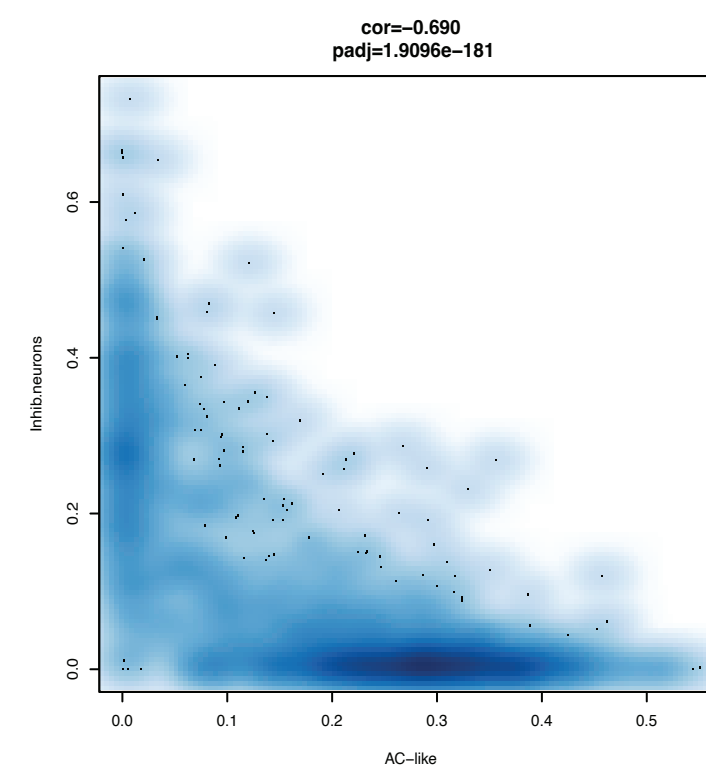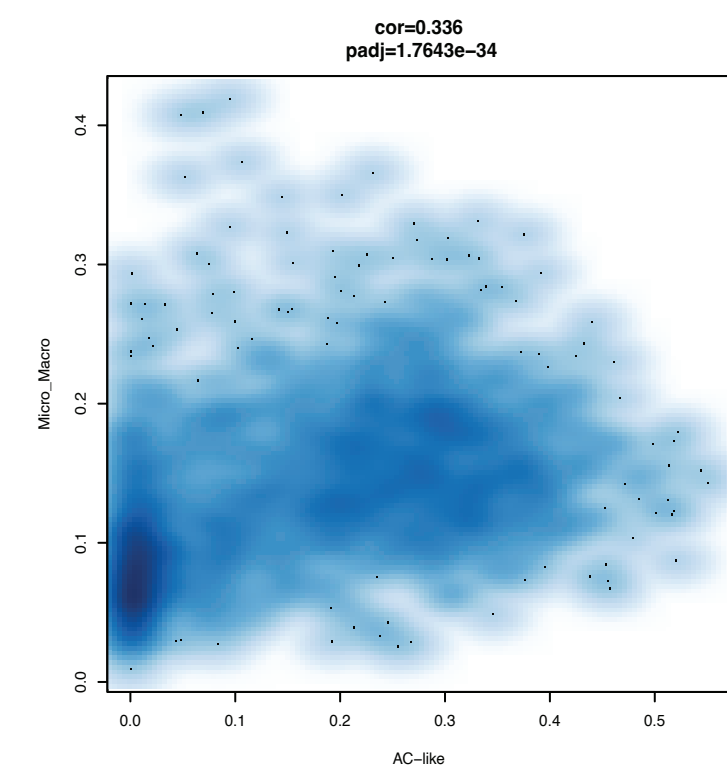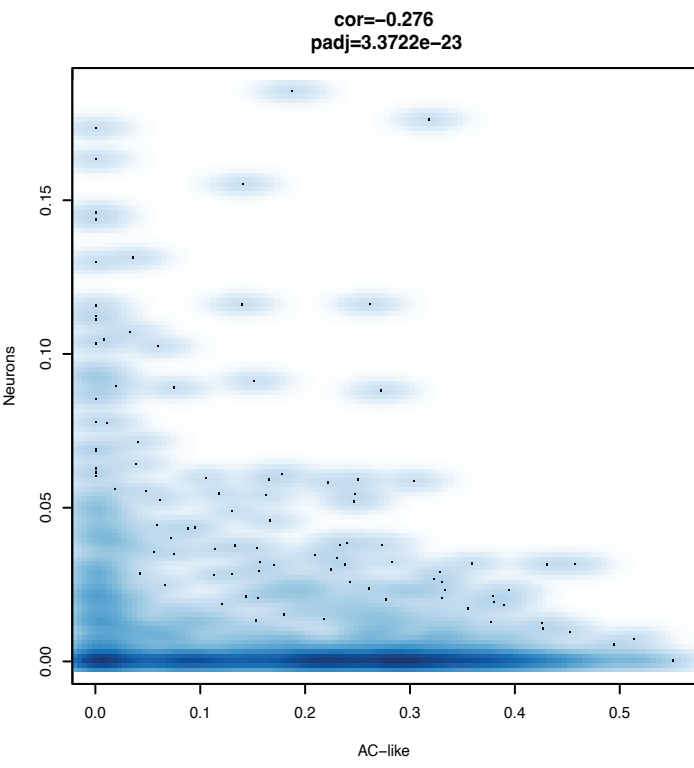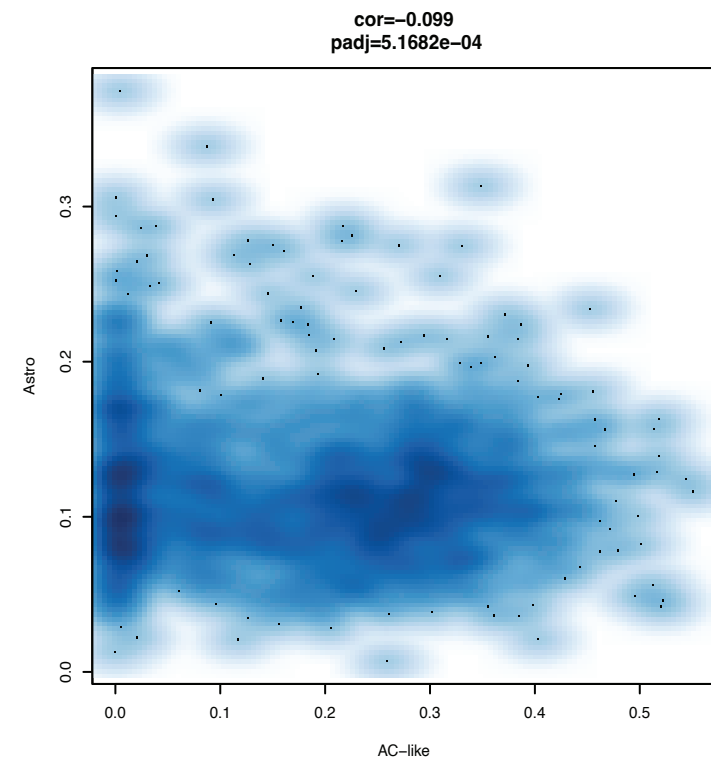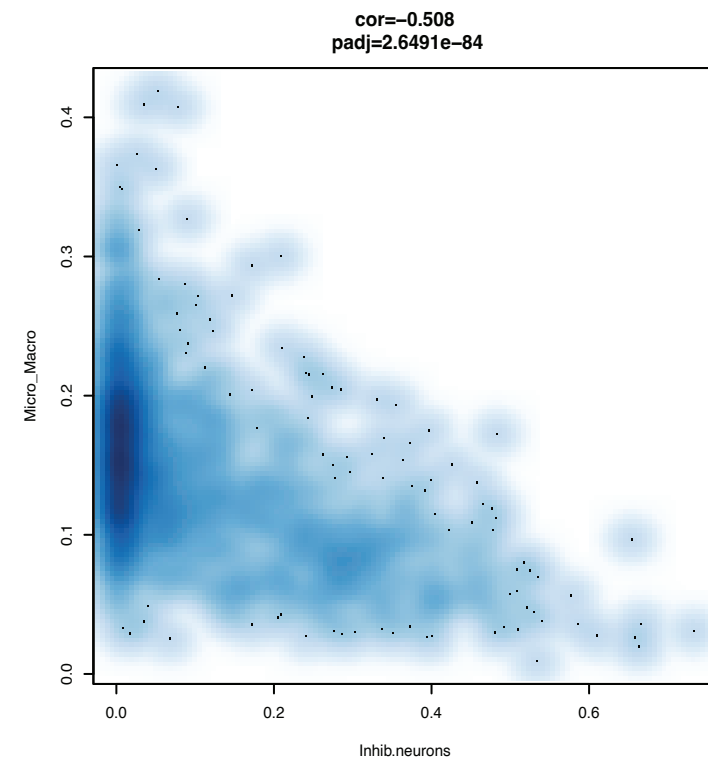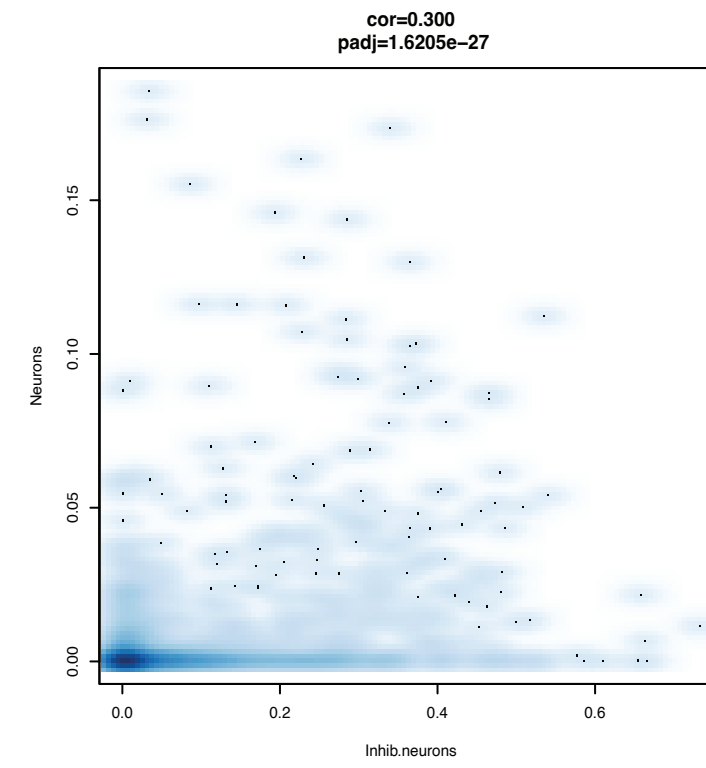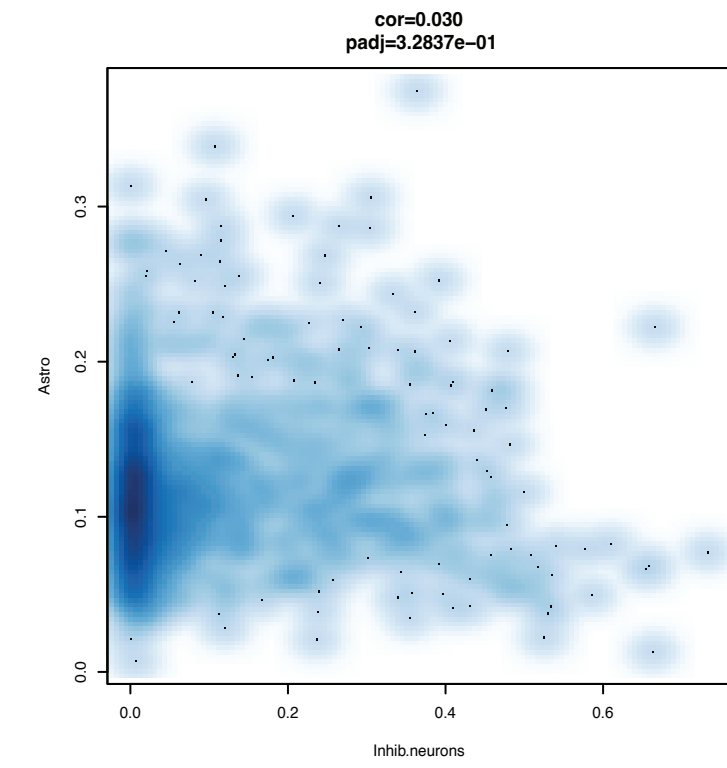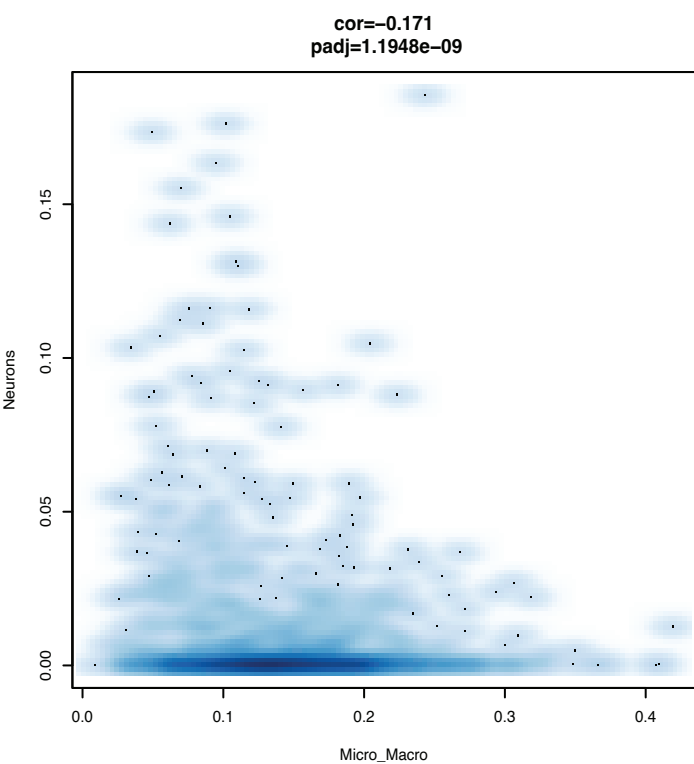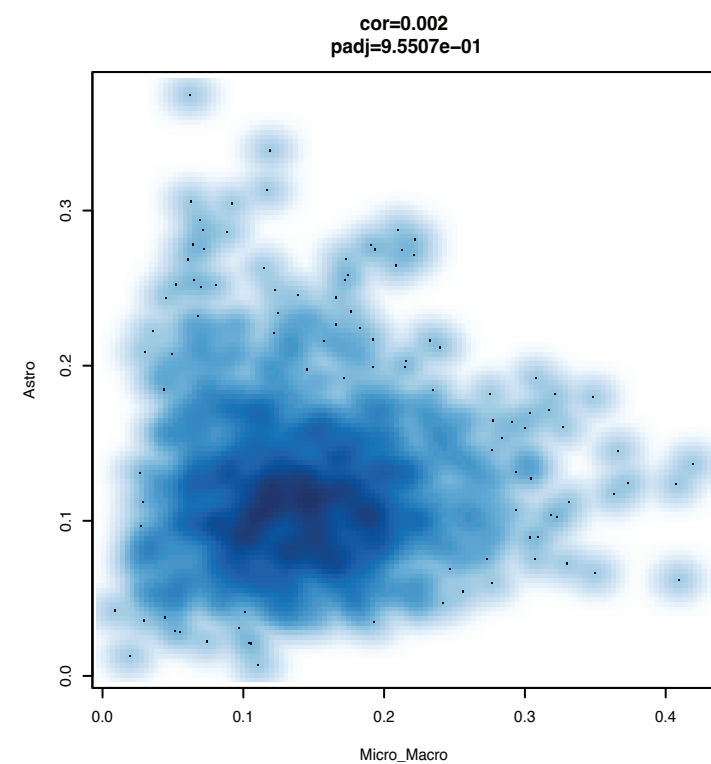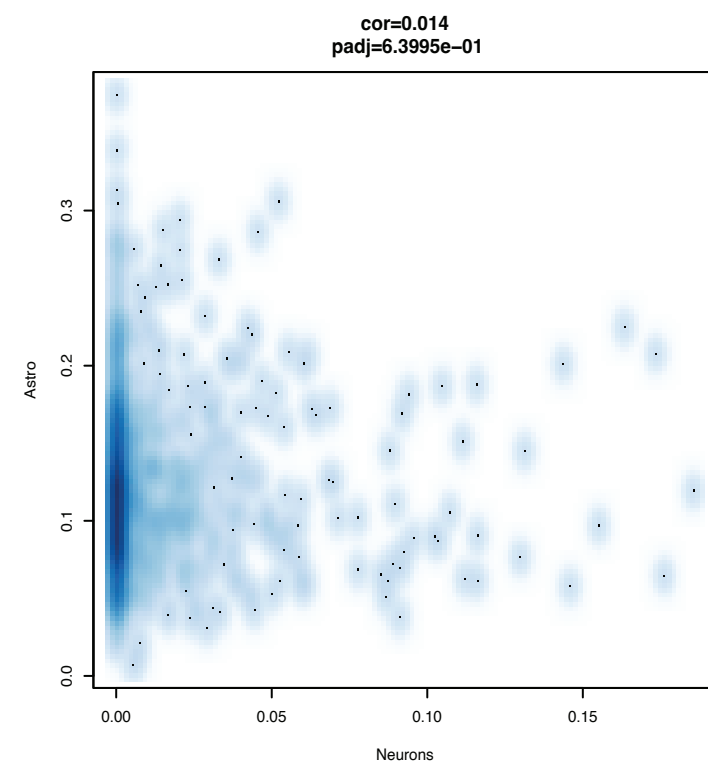

Supplement: 40478_2024_1769_MOESM6_ESM.pdf [file 40478_2024_1769_MOESM6_ESM.pdf]
