# Supplementary material for: Spatial transcriptomics reveals segregation of tumor cell states in glioblastoma and marked immunosuppression within the perinecrotic niche
Source: PubMed Central journal article supplement (PMC11036705; doi:10.1186/s40478-024-01769-0), 2024-04-22

**a**

18-0282

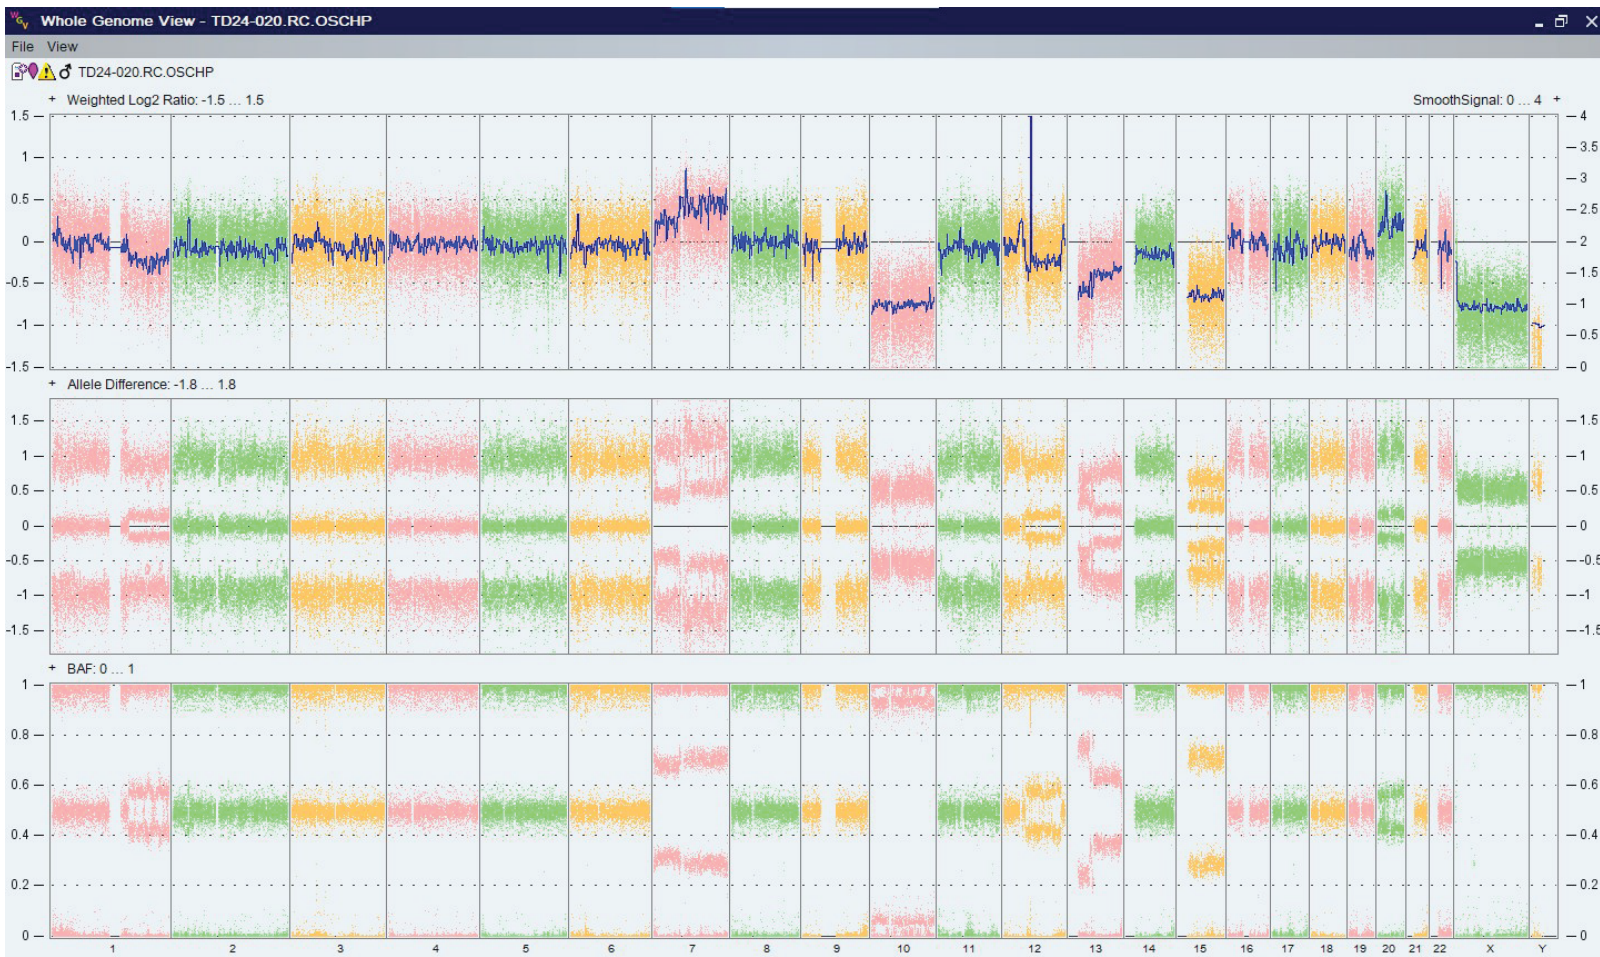**b**

19-0142

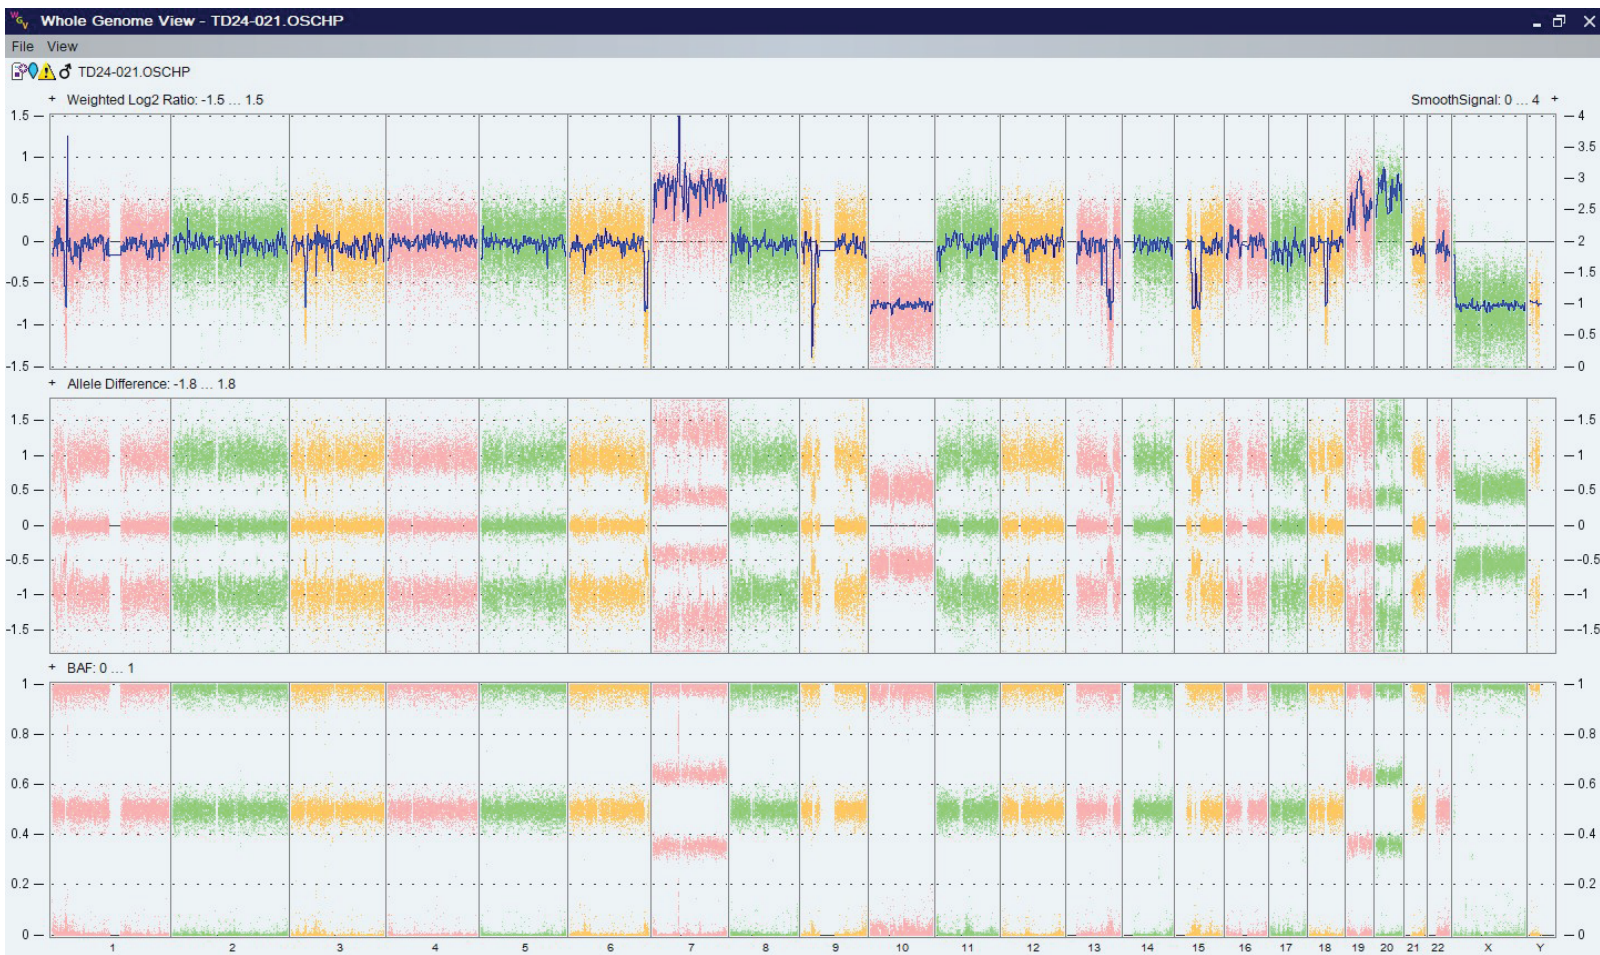**c**

19-0341

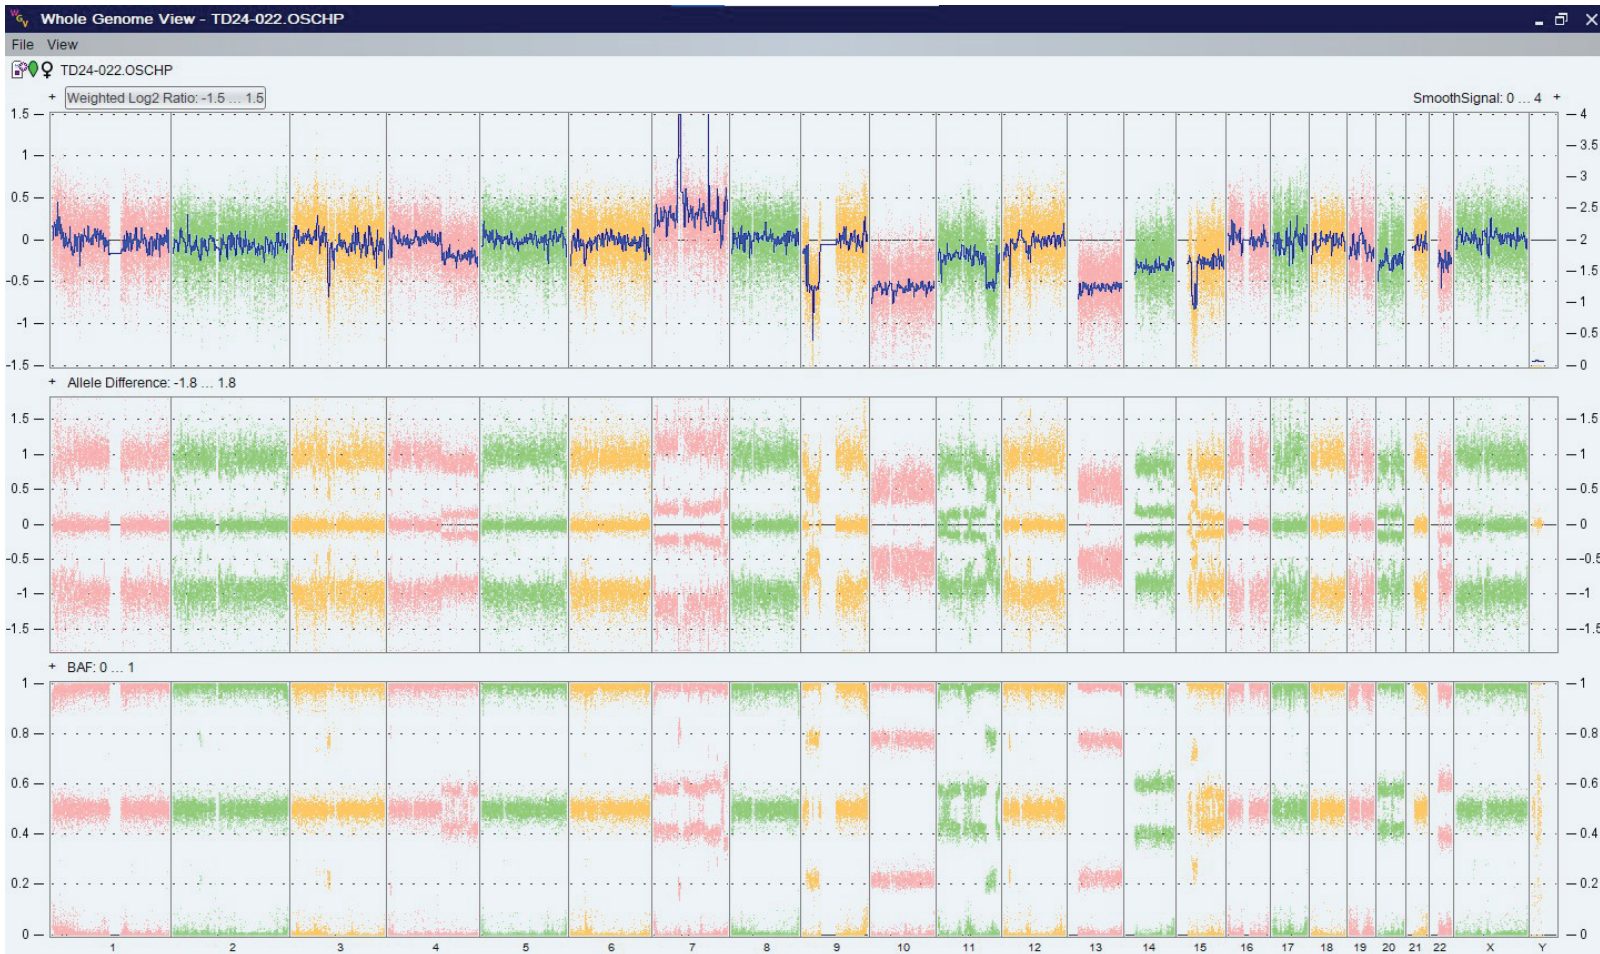

Supplement: 40478_2024_1769_MOESM4_ESM.pdf [file 40478_2024_1769_MOESM4_ESM.pdf]
