# Supplementary material for: Spatial transcriptomics reveals segregation of tumor cell states in glioblastoma and marked immunosuppression within the perinecrotic niche
Source: PubMed Central journal article supplement (PMC11036705; doi:10.1186/s40478-024-01769-0), 2024-04-22
Supplement: 40478_2024_1769_MOESM11_ESM.pdf [file 40478_2024_1769_MOESM11_ESM.pdf]

Correlation = 0.0176

logFC(perivascular niche-generic tumor) in 19-0142

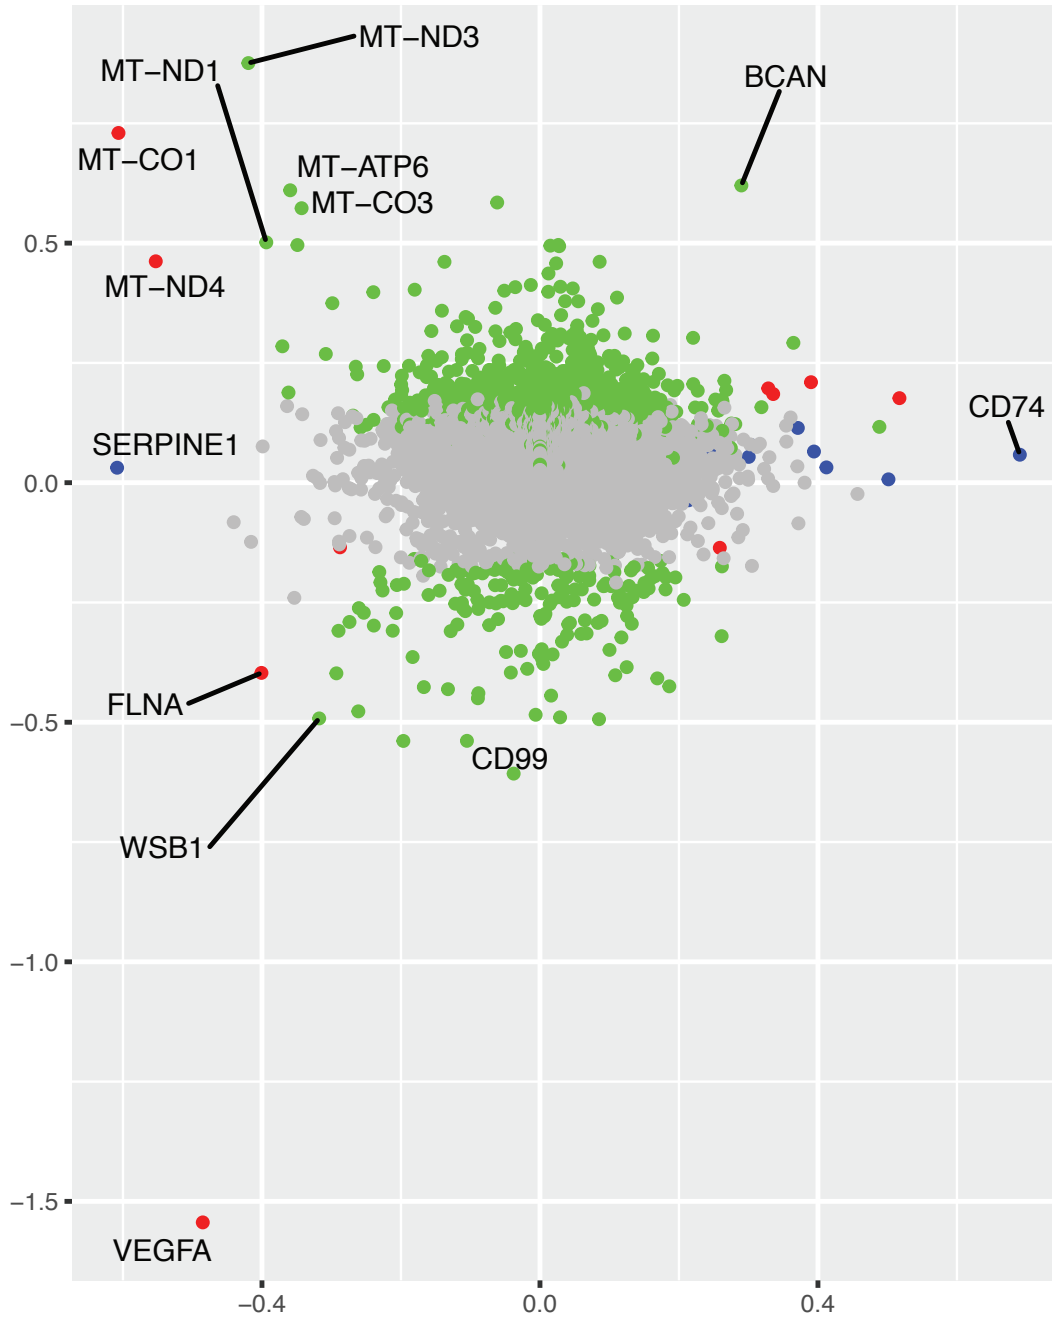

significance

- not.sig
- sig.18-0282
- sig.19-0142
- sig.both

logFC(perivascular niche-generic tumor) in 18-0282
