# Supplementary material for: Spatial transcriptomics reveals segregation of tumor cell states in glioblastoma and marked immunosuppression within the perinecrotic niche
Source: Springer Nature journal article supplement (doi:10.1186/s40478-024-01769-0), 2024-04-22

# clustree analysis

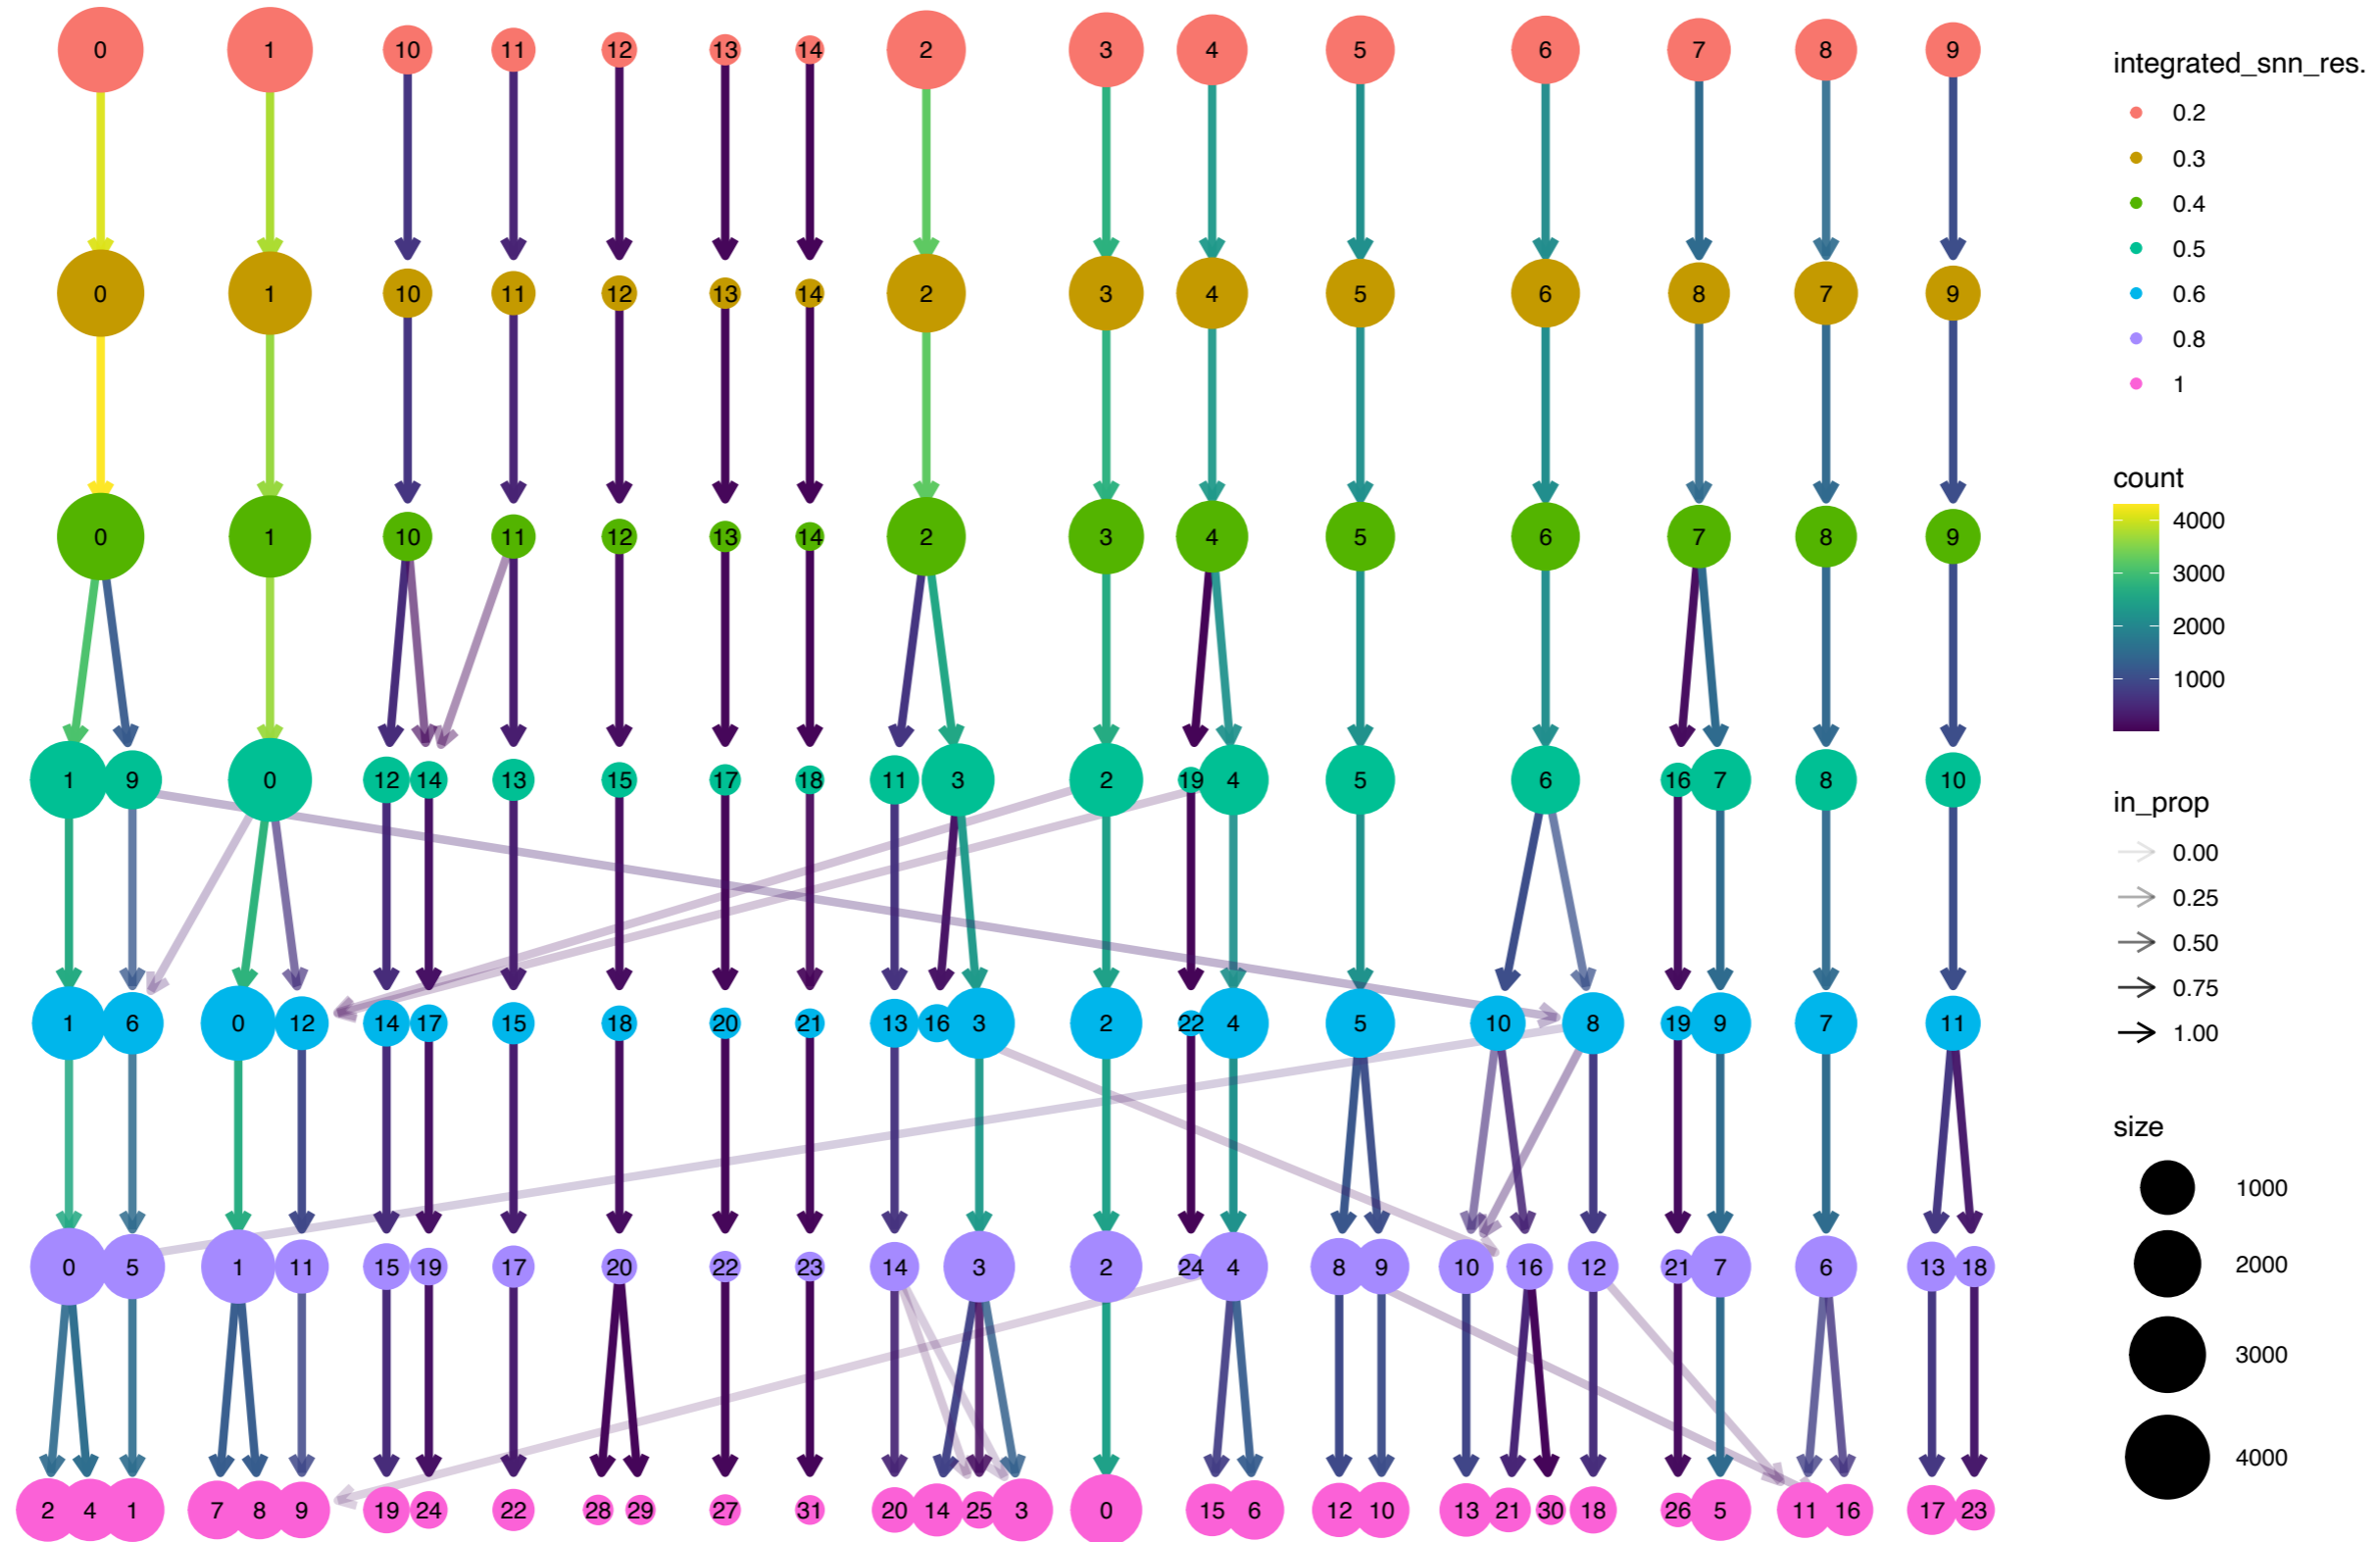

Supplement: MOESM2 [file 27003684]
